# Supplementary material for: RNA recognition motifs of disease-linked RNA-binding proteins contribute to amyloid formation
Source: PubMed Central journal article supplement (PMC6467989; doi:10.1038/s41598-019-42367-8), 2019-04-16
Supplement: 41598_2019_42367_MOESM1_ESM.pdf [file 41598_2019_42367_MOESM1_ESM.pdf]

## **Supplementary Information**

### **RNA recognition motifs of disease-linked RNA-binding proteins contribute to amyloid formation**

Sashank Agrawal<sup>1,2</sup>, Pan-Hsien Kuo<sup>2</sup>, Lee-Ya Chu<sup>2,3,4</sup>, Bagher Golzarroshan<sup>2</sup>,  
Monika Jain<sup>1,2</sup> and Hanna S. Yuan<sup>1,2\*</sup>

This file includes:

Supplementary Figure 1

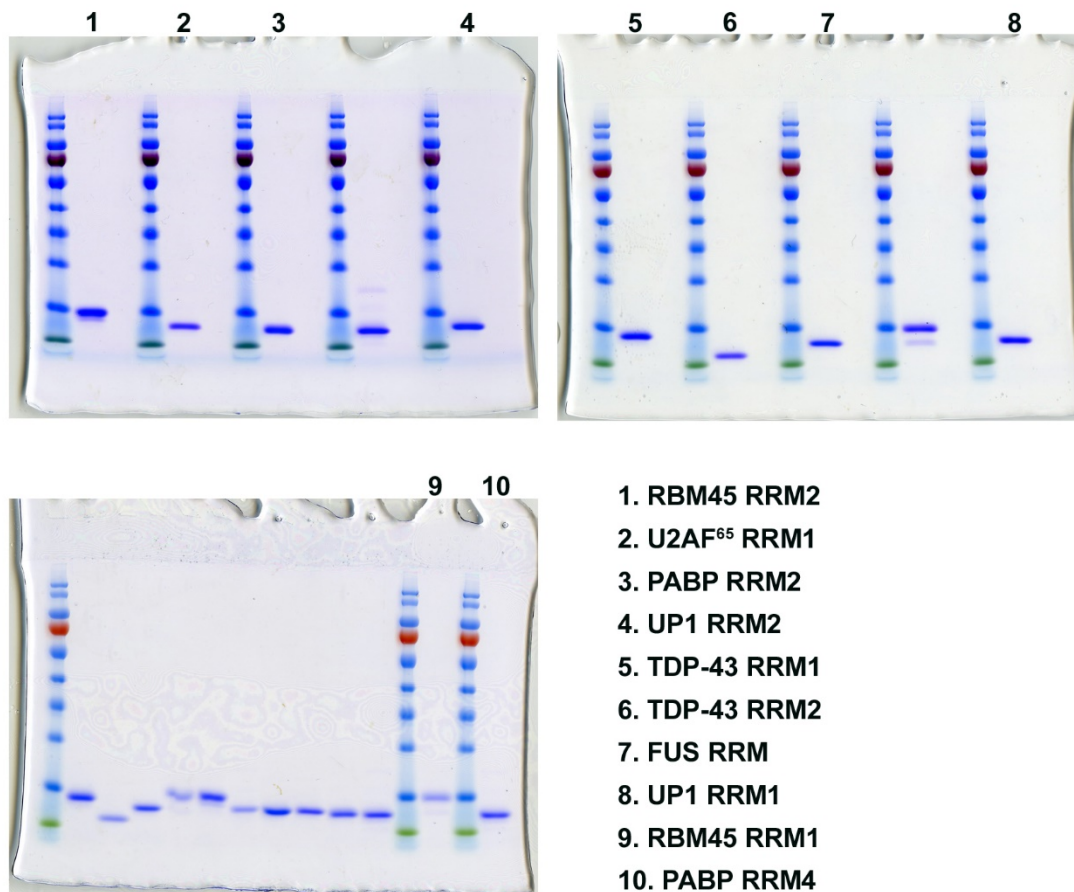

**Supplementary Figure 1.** The full-length SDS-PAGE gels show that each of the ten RRMs was purified to a high homogeneity (cropped images are shown in Figure 1).
